# Supplementary material for: Molecular Evolution of the Neuropeptide S Receptor
Source: PLoS One. 2012 Mar 30;7(3):e34046. doi: 10.1371/journal.pone.0034046 (PMC3316597; doi:10.1371/journal.pone.0034046)
Supplement: Table S1 — List of identified neuropeptide S receptors. (DOC) [file pone.0034046.s005.doc]

**Table S1.** List of identified Neuropeptide S receptors.

| **Binomial nomenclature** | **Common Name /Names used in further studies** | **Accession number** |
| --- | --- | --- |
| *Homo sapiens*d# | human NPSRp | ENSP00000352839a |
| *Otolemur garnettii*d# | bush baby NPSR | ENSOGAP00000009225a |
| *Callithrix jacchus*d# | marmoset NPSR | ENSCJAP00000022279a |
| *Gallus gallus*d# | chicken NPSRp | ENSGALP00000019838a |
| *Pan troglodytes*d# | chimpanzee NPSR | ENSPTRP00000045319a |
| *Tursiops truncatus*d# | dolphin NPSR* p | ENSTTRP00000015651a |
| *Cavia porcellus*d# | guinea pig NPSR | XP_003470021b |
| *Equus caballus*d# | horse NPSR | ENSECAP00000010898a |
| *Macaca mulatta*d# | macaque NPSR | ENSMMUP00000035218a |
| *Pteropus vampyrus*d# | megabat NPSRp | ENSPVAP00000016321a |
| *Mus musculus*d# | mouse NPSRp | ENSMUSP00000056432a |
| ***Microcebus murinus***d# | mouse lemur NPSR | ENSMICP00000007592a |
| *Rattus norvegicus*d# | rat NPSR | ENSRNOP00000021625a |
| *Taeniopygia guttata*d# | zebra finch NPSR | ENSTGUP00000005494a |
| *Monodelphis domestica*d# | opossum NPSRp | XP_001365641b |
| *Bos taurus*d# | cow NPSR | NP_001179906b |
| *Canis familiaris*d# | dog NPSR | XP_539511b |
| *Ailuropoda melanoleuca*d# | giant panda NPSR | XP_002918703b |
| *Pongo abelii*d# | orangutan NPSR | XP_002818110b |
| ***Xenopus tropicalis***d# | frog NPSRp | XP_002937035b |
| *Oryctolagus cuniculus*d# | rabbit NPSR | NP_001191373b |
| *Gorilla gorilla*d# | gorilla NPSR | ENSGGOP00000011480a |
| *Loxodonta africana*d# | elephant NPSR | ENSLAFP00000015087a |
| *Branchiostoma floridae*# | lancelet NPSR-like*+p | 212588 c |
| *Saccoglossus kowalevskii*# | acorn worm NPSR-like+p | XP_002732566b |
| *Anolis carolinensis*# | lizard NPSR*p | XP_003222313b |
| *Sus scrofa* | pig NPSR | XP_003134844b |
| *Meleagris gallopavo* | turkey NPSR | XP_003207347b |
| *Vicugna pacos* | alpaca NPSR ° | ENSVPAP00000009304a |
| *Dasypus novemcinctus* | armadillo NPSR ° | ENSDNOP00000003020a |
| *Felis catus* | cat NPSR ° | ENSFCAP00000006534a |
| *Erinaceus europaeus* | hedgehog NPSR ° | ENSEEUP00000006102a |
| *Procavia capensis* | hyrax NPSR ° | ENSPCAP00000004629a |
| *Dipodomys ordii* | kangaroo rat NPSR ° | ENSDORP00000003505a |
| *Echinops telfairi* | lesser hedgehog tenrec NPSR ° | ENSETEP00000016539a |
| *Myotis lucifugus* | microbat NPSR ° | ENSMLUP00000012652a |
| *Ochotona princeps* | pika NPSR ° | ENSOPRP00000006534a |
| *Sorex araneus* | shrew NPSR ° | ENSSARP00000005435a |
| *Choloepus hoffmanni* | sloth NPSR ° | ENSCHOP00000000687a |
| *Spermophilus tridecemlineatus* | squirrel NPSR ° | ENSSTOP00000007424a |
| *Tarsius syrichta* | tarsier NPSR ° | ENSTSYP00000006128a |
| *Macropus eugenii* | wallaby NPSR ° | ENSMEUP00000014078a |

a Sequence from Ensembl database,  b Sequence from NCBI database and c Sequence from JGI database.

Sequences corrected manually at N and C- termini are represented with * and + on their sequence names

° Represents incomplete sequences.

p Sequences used in the phylogeny.

d Sequences used in the functional divergence analysis (Data S3).

# Represents sequences used for gene structure analyses (Figure S4, Data S2).
